# Supplementary material for: A Pilot Study on Behavioural and Physiological Indicators of Emotions in Donkeys
Source: MDPI journal article supplement (doi:10.3390/ani13091466), 2023-04-25
Supplement: s1 [file s1]

**Table S1.** Behavioural modes and positions observed during the (+) and (−) tests. Median [1st quartile; 3rd quartile] of the activity budget, frequency per minute, richness, Shannon and Gini-Simpson indices. Wilcoxon signed-rank test statistic (V) and *p*-values in bold: significant differences between the two test groups.

| Type                 | Mode           | (+) Test                | (−) Test                | Wilcoxon signed-rank test        |
|----------------------|----------------|-------------------------|-------------------------|----------------------------------|
| Activity budget      | Body F         | 43.652 [0.000; 83.133]  | 8.057 [1.806; 25.892]   | V = 32, <i>p</i> = 0.301         |
|                      | Body L         | 0.000 [0.000; 64.507]   | 27.925 [0.000; 41.135]  | V = 15, <i>p</i> = 0.933         |
|                      | Body R         | 0.000 [0.000; 0.000]    | 29.581 [0.000; 53.305]  | V = 3, <i>p</i> = 0.142          |
|                      | Head F         | 35.850 [31.423; 37.743] | 26.280 [22.556; 36.482] | V = 34, <i>p</i> = 0.203         |
|                      | Head L         | 41.856 [39.524; 51.949] | 25.150 [12.384; 47.195] | V = 33, <i>p</i> = 0.250         |
|                      | Head R         | 6.848 [6.072; 19.437]   | 28.398 [21.125; 31.084] | V = 9, <i>p</i> = 0.129          |
|                      | L-ear BU       | 13.652 [7.347; 36.564]  | 6.908 [1.855; 7.199]    | <b>V = 45, <i>p</i> = 0.004</b>  |
|                      | L-ear BD       | 2.454 [0.567; 3.741]    | 0.883 [0.000; 7.389]    | V = 22, <i>p</i> = 1             |
|                      | L-ear FU       | 19.638 [11.736; 32.948] | 57.288 [50.748; 71.007] | <b>V = 0, <i>p</i> = 0.004</b>   |
|                      | L-ear SD       | 0.497 [0.000; 2.287]    | 3.446 [0.135; 5.832]    | V = 14, <i>p</i> = 0.624         |
|                      | L-ear SU       | 37.556 [29.141; 44.717] | 26.536 [24.919; 32.593] | <b>V = 45, <i>p</i> = 0.004</b>  |
|                      | R-ear BU       | 16.820 [3.409; 29.037]  | 5.058 [3.782; 8.854]    | V = 39, <i>p</i> = 0.055         |
|                      | R-ear BD       | 2.891 [0.585; 4.309]    | 1.764 [0.000; 3.037]    | V = 24, <i>p</i> = 0.441         |
|                      | R-ear FU       | 19.515 [11.035; 35.133] | 53.243 [41.826; 69.999] | <b>V = 0, <i>p</i> = 0.004</b>   |
|                      | R-ear SD       | 0.405 [0.000; 22.030]   | 0.000 [0.000; 1.150]    | V = 22, <i>p</i> = 0.205         |
|                      | R-ear SU       | 43.138 [34.102; 59.218] | 30.331 [22.130; 35.446] | <b>V = 41, <i>p</i> = 0.027</b>  |
|                      | 3 legs         | 0.000 [0.000; 0.879]    | 1.438 [0.603; 2.236]    | V = 6, <i>p</i> = 0.205          |
|                      | 4 legs         | 92.017 [82.508; 92.907] | 63.110 [58.107; 68.095] | <b>V = 45, <i>p</i> = 0.004</b>  |
|                      | Bent knee      | 0.164 [0.000; 0.522]    | 2.765 [1.510; 3.000]    | <b>V = 0, <i>p</i> = 0.014</b>   |
|                      | Pointing       | 0.000 [0.000; 0.000]    | 0.000 [0.000; 0.000]    | V = 4, <i>p</i> = 0.789          |
|                      | Walk           | 6.784 [4.959; 14.802]   | 22.441 [18.423; 26.595] | <b>V = 0, <i>p</i> = 0.004</b>   |
|                      | Walk away      | 0.000 [0.000; 0.000]    | 4.912 [0.000; 7.618]    | <b>V = 0, <i>p</i> = 0.036</b>   |
|                      | Ground exp     | 0.000 [0.000; 0.000]    | 1.119 [0.000; 2.368]    | <b>V = 0, <i>p</i> = 0.036</b>   |
|                      | Ground eat     | 0.000 [0.000; 0.000]    | 0.000 [0.000; 2.610]    | V = 1, <i>p</i> = 0.201          |
|                      | Manip exp      | 0.000 [0.000; 4.793]    | 13.876 [8.533; 15.657]  | <b>V = 0, <i>p</i> = 0.004</b>   |
|                      | Scan env       | 3.546 [3.172; 3.924]    | 12.531 [7.515; 26.730]  | V = 9, <i>p</i> = 0.129          |
|                      | Scan manip     | 3.184 [1.891; 7.843]    | 9.420 [5.318; 12.674]   | V = 14, <i>p</i> = 0.359         |
|                      | Mouth mov      | 0.000 [0.000; 0.000]    | 0.000 [0.000; 2.274]    | V = 4, <i>p</i> = 0.418          |
|                      | Feed chew      | 85.865 [72.390; 89.766] | 3.246 [0.000; 17.522]   | <b>V = 45, <i>p</i> = 0.004</b>  |
|                      | Vacuum chew    | 0.000 [0.000; 0.000]    | 4.137 [0.300; 13.775]   | <b>V = 0, <i>p</i> = 0.022</b>   |
| Frequency per minute | Body position  | 0.649 [0.588; 1.176]    | 2.273 [1.538; 2.941]    | <b>V = 0, <i>p</i> = 0.022</b>   |
|                      | Head position  | 15.862 [12.727; 21.176] | 12.308 [11.176; 14.545] | V = 27, <i>p</i> = 0.652         |
|                      | L-ear position | 18.636 [16.471; 20.000] | 23.636 [17.059; 28.235] | V = 14, <i>p</i> = 0.359         |
|                      | R-ear position | 18.636 [11.176; 24.706] | 20.000 [19.412; 26.364] | V = 15, <i>p</i> = 0.426         |
|                      | Walk           | 0.789 [0.649; 1.538]    | 4.615 [3.553; 4.865]    | <b>V = 0, <i>p</i> = 0.004</b>   |
|                      | Walk away      | 0.000 [0.000; 0.000]    | 0.606 [0.000; 1.176]    | <b>V = 0, <i>p</i> = 0.036</b>   |
|                      | Standing       | 4.242 [1.765; 4.615]    | 12.273 [4.615; 16.923]  | <b>V = 1, <i>p</i> = 0.008</b>   |
|                      | Ground exp     | 0.000 [0.000; 0.395]    | 1.538 [0.909; 1.946]    | <b>V = 0, <i>p</i> = 0.022</b>   |
|                      | Manip exp      | 0.000 [0.000; 0.690]    | 2.595 [1.538; 3.529]    | <b>V = 1, <i>p</i> = 0.013</b>   |
|                      | Scan env       | 1.212 [0.909; 1.538]    | 3.529 [2.763; 4.848]    | <b>V = 1.5, <i>p</i> = 0.025</b> |
|                      | Scan manip     | 1.176 [0.455; 1.379]    | 3.077 [1.818; 4.615]    | <b>V = 0, <i>p</i> = 0.022</b>   |
|                      | Mouth mov      | 0.000 [0.000; 0.000]    | 0.000 [0.000; 0.909]    | V = 1, <i>p</i> = 0.106          |
|                      | Feed chew      | 0.690 [0.588; 1.176]    | 0.324 [0.000; 1.538]    | V = 16, <i>p</i> = 0.834         |
|                      | Vacuum chew    | 0.000 [0.000; 0.000]    | 1.176 [0.606; 2.941]    | <b>V = 0, <i>p</i> = 0.022</b>   |
| Indices              | Richness       | 20.000 [19.000; 22.000] | 24.000 [22.000; 25.000] | <b>V = 0, <i>p</i> = 0.022</b>   |

| Type | Mode               | (+) Test             | (−) Test             | Wilcoxon signed-rank test            |
|------|--------------------|----------------------|----------------------|--------------------------------------|
|      | Shannon Index      | 2.491 [2.390; 2.541] | 2.754 [2.635; 2.854] | <b>V = 3, <math>p = 0.020</math></b> |
|      | Gini-Simpson Index | 0.896 [0.889; 0.909] | 0.924 [0.909; 0.933] | <b>V = 4, <math>p = 0.027</math></b> |
