# Supplementary figures and images for: A Pilot Study on Behavioural and Physiological Indicators of Emotions in Donkeys
Source: MDPI journal article supplement (doi:10.3390/ani13091466), 2023-04-25

Euclidean

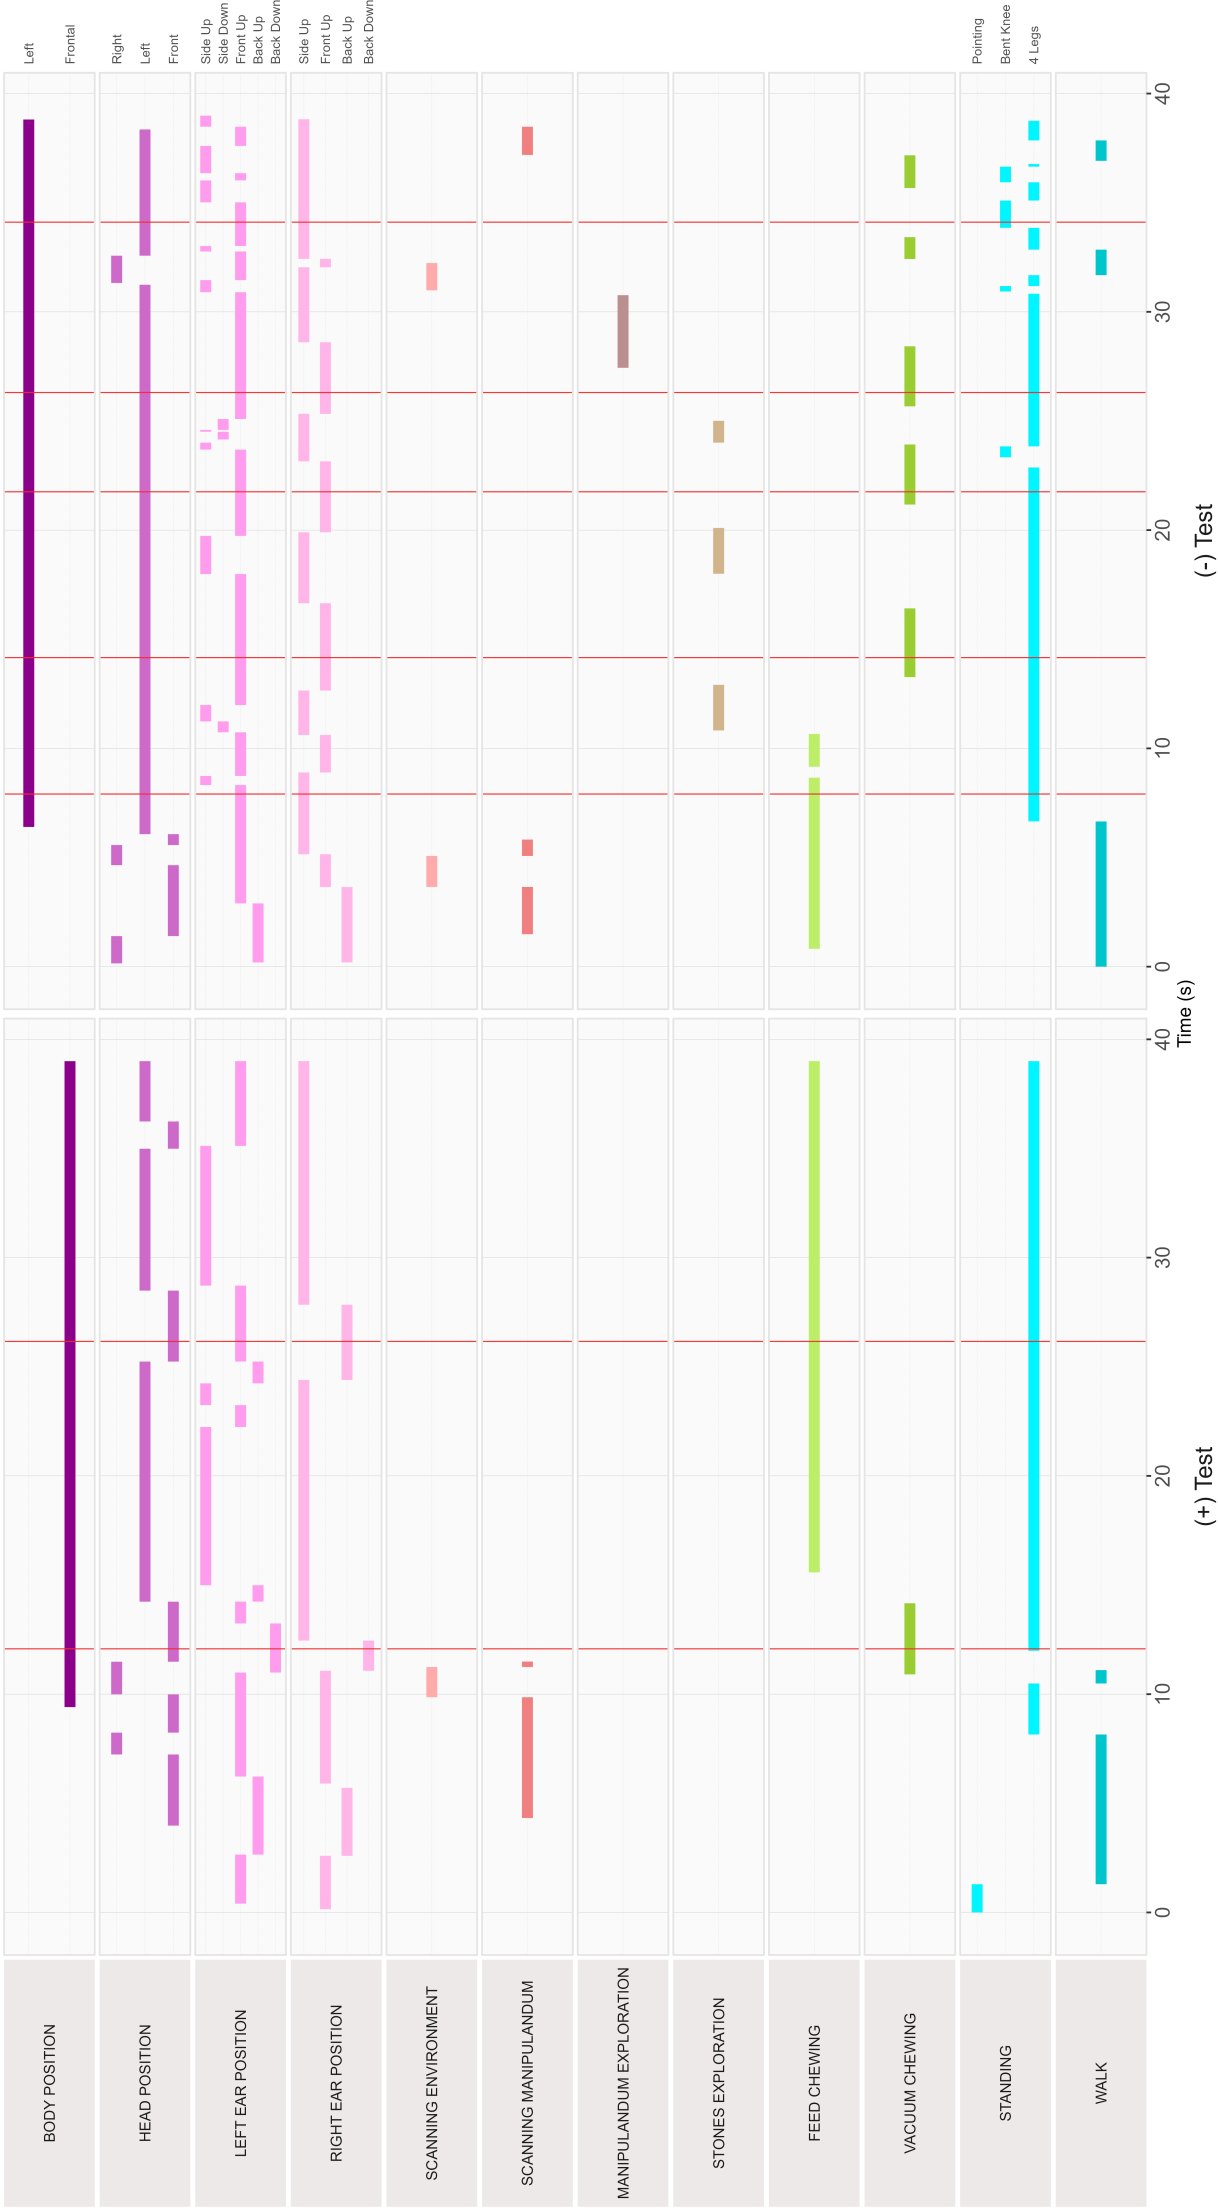

Giorgina

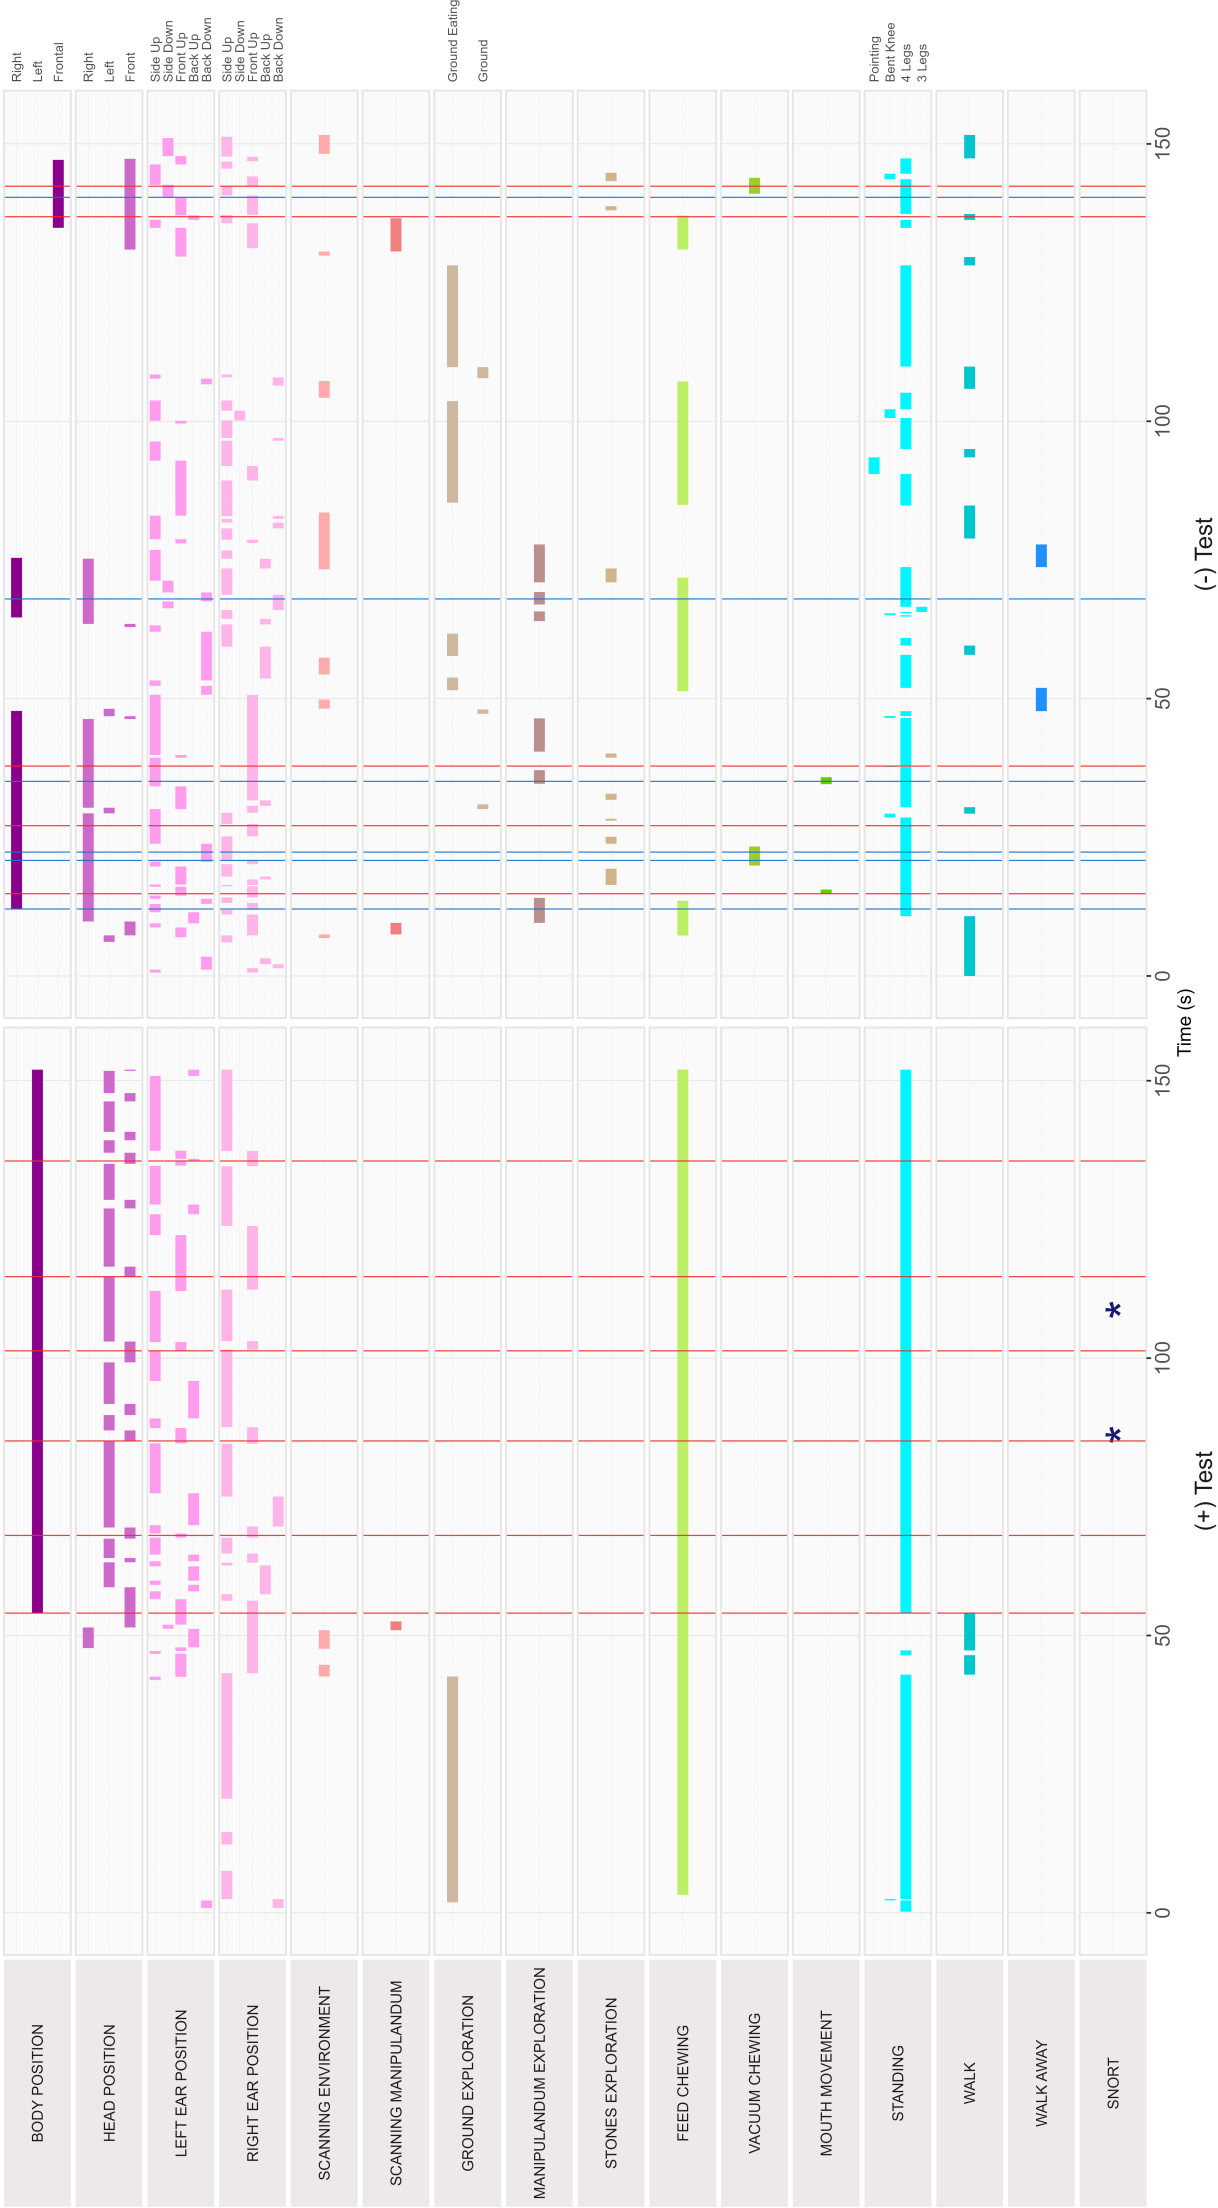

Huggy

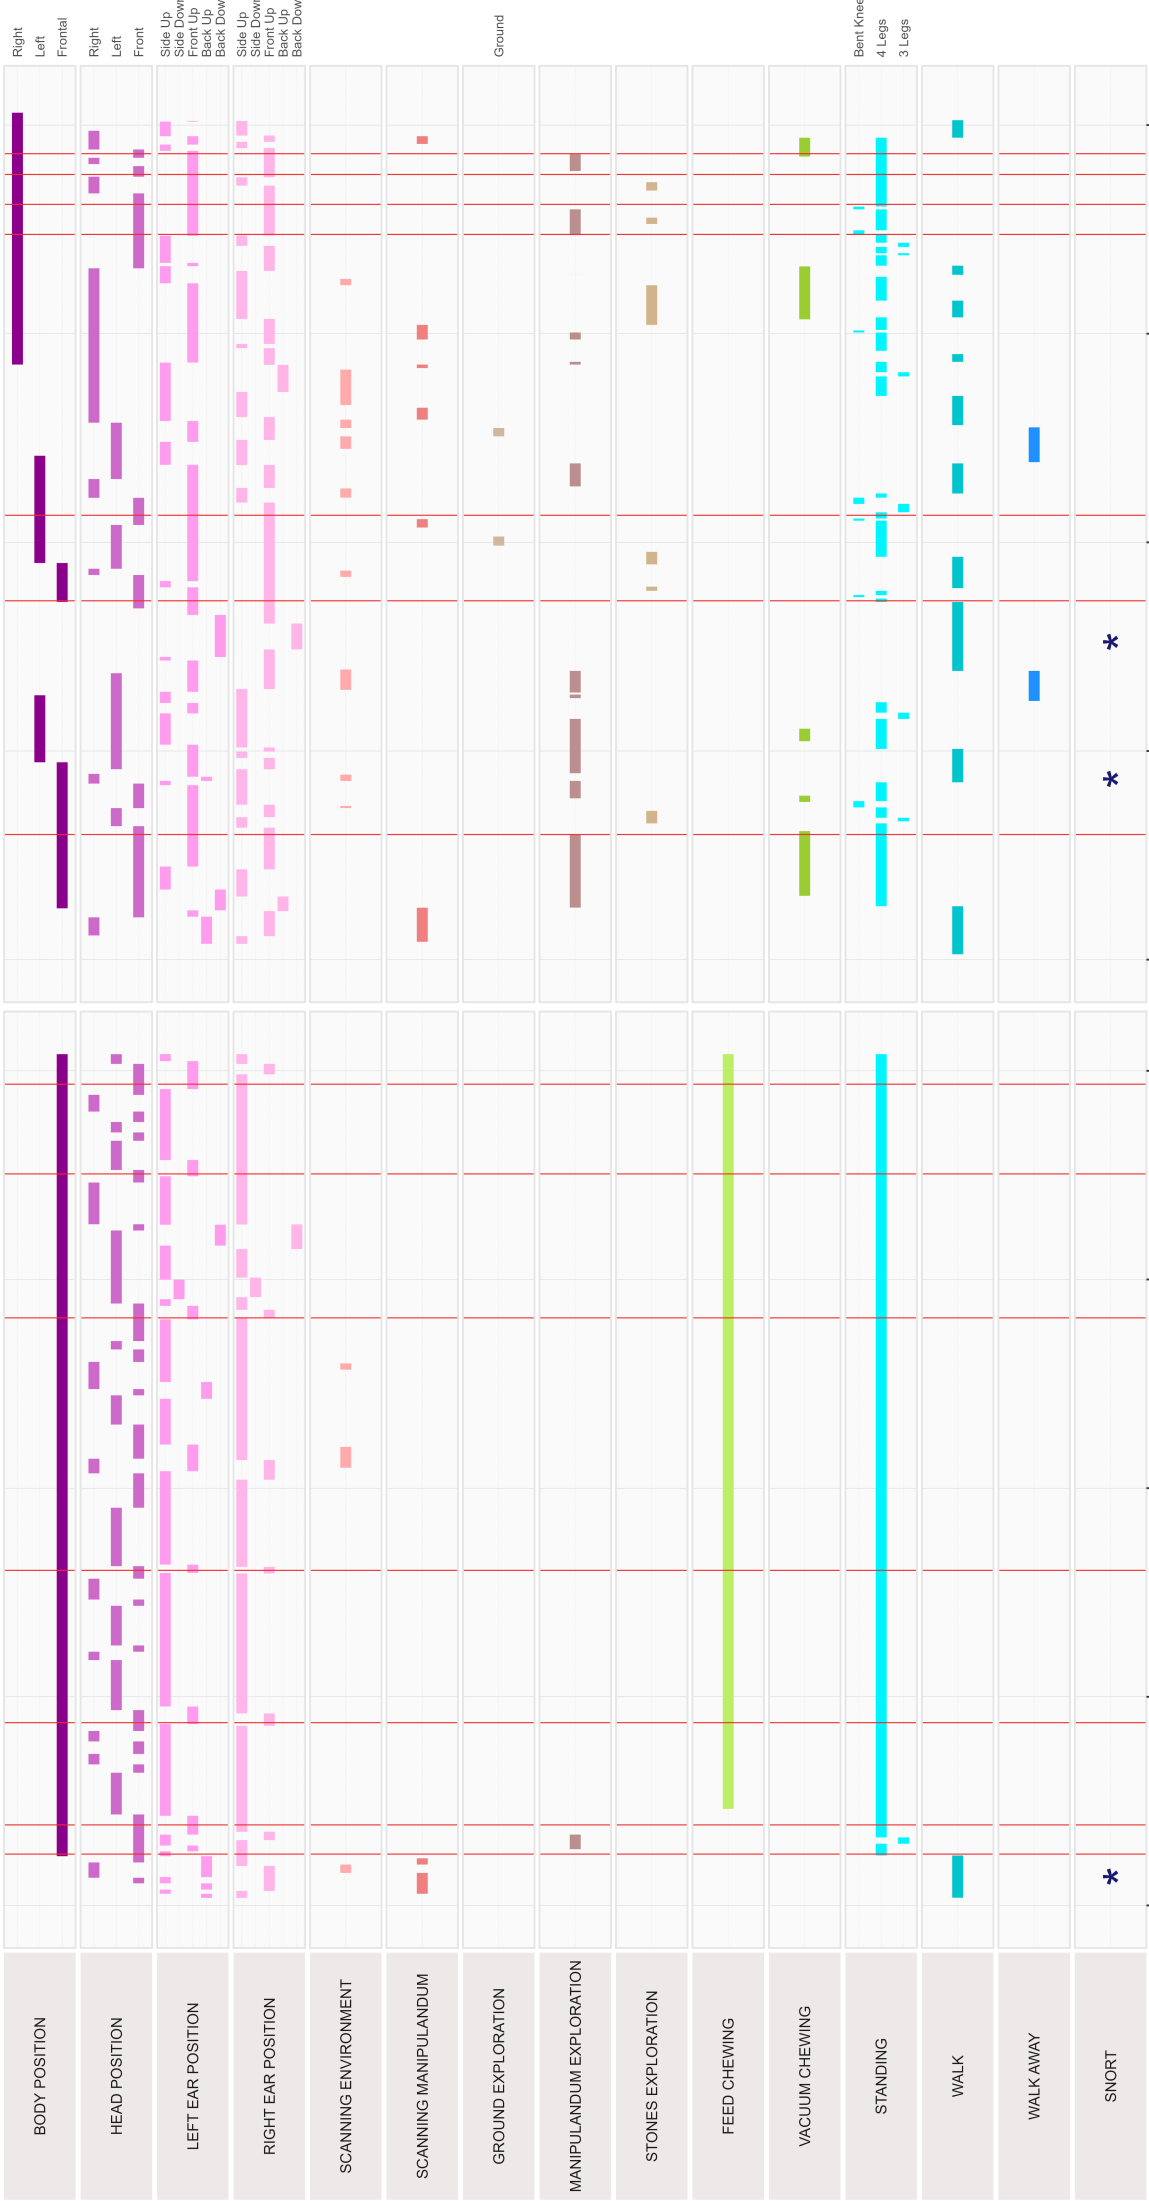

Lolita

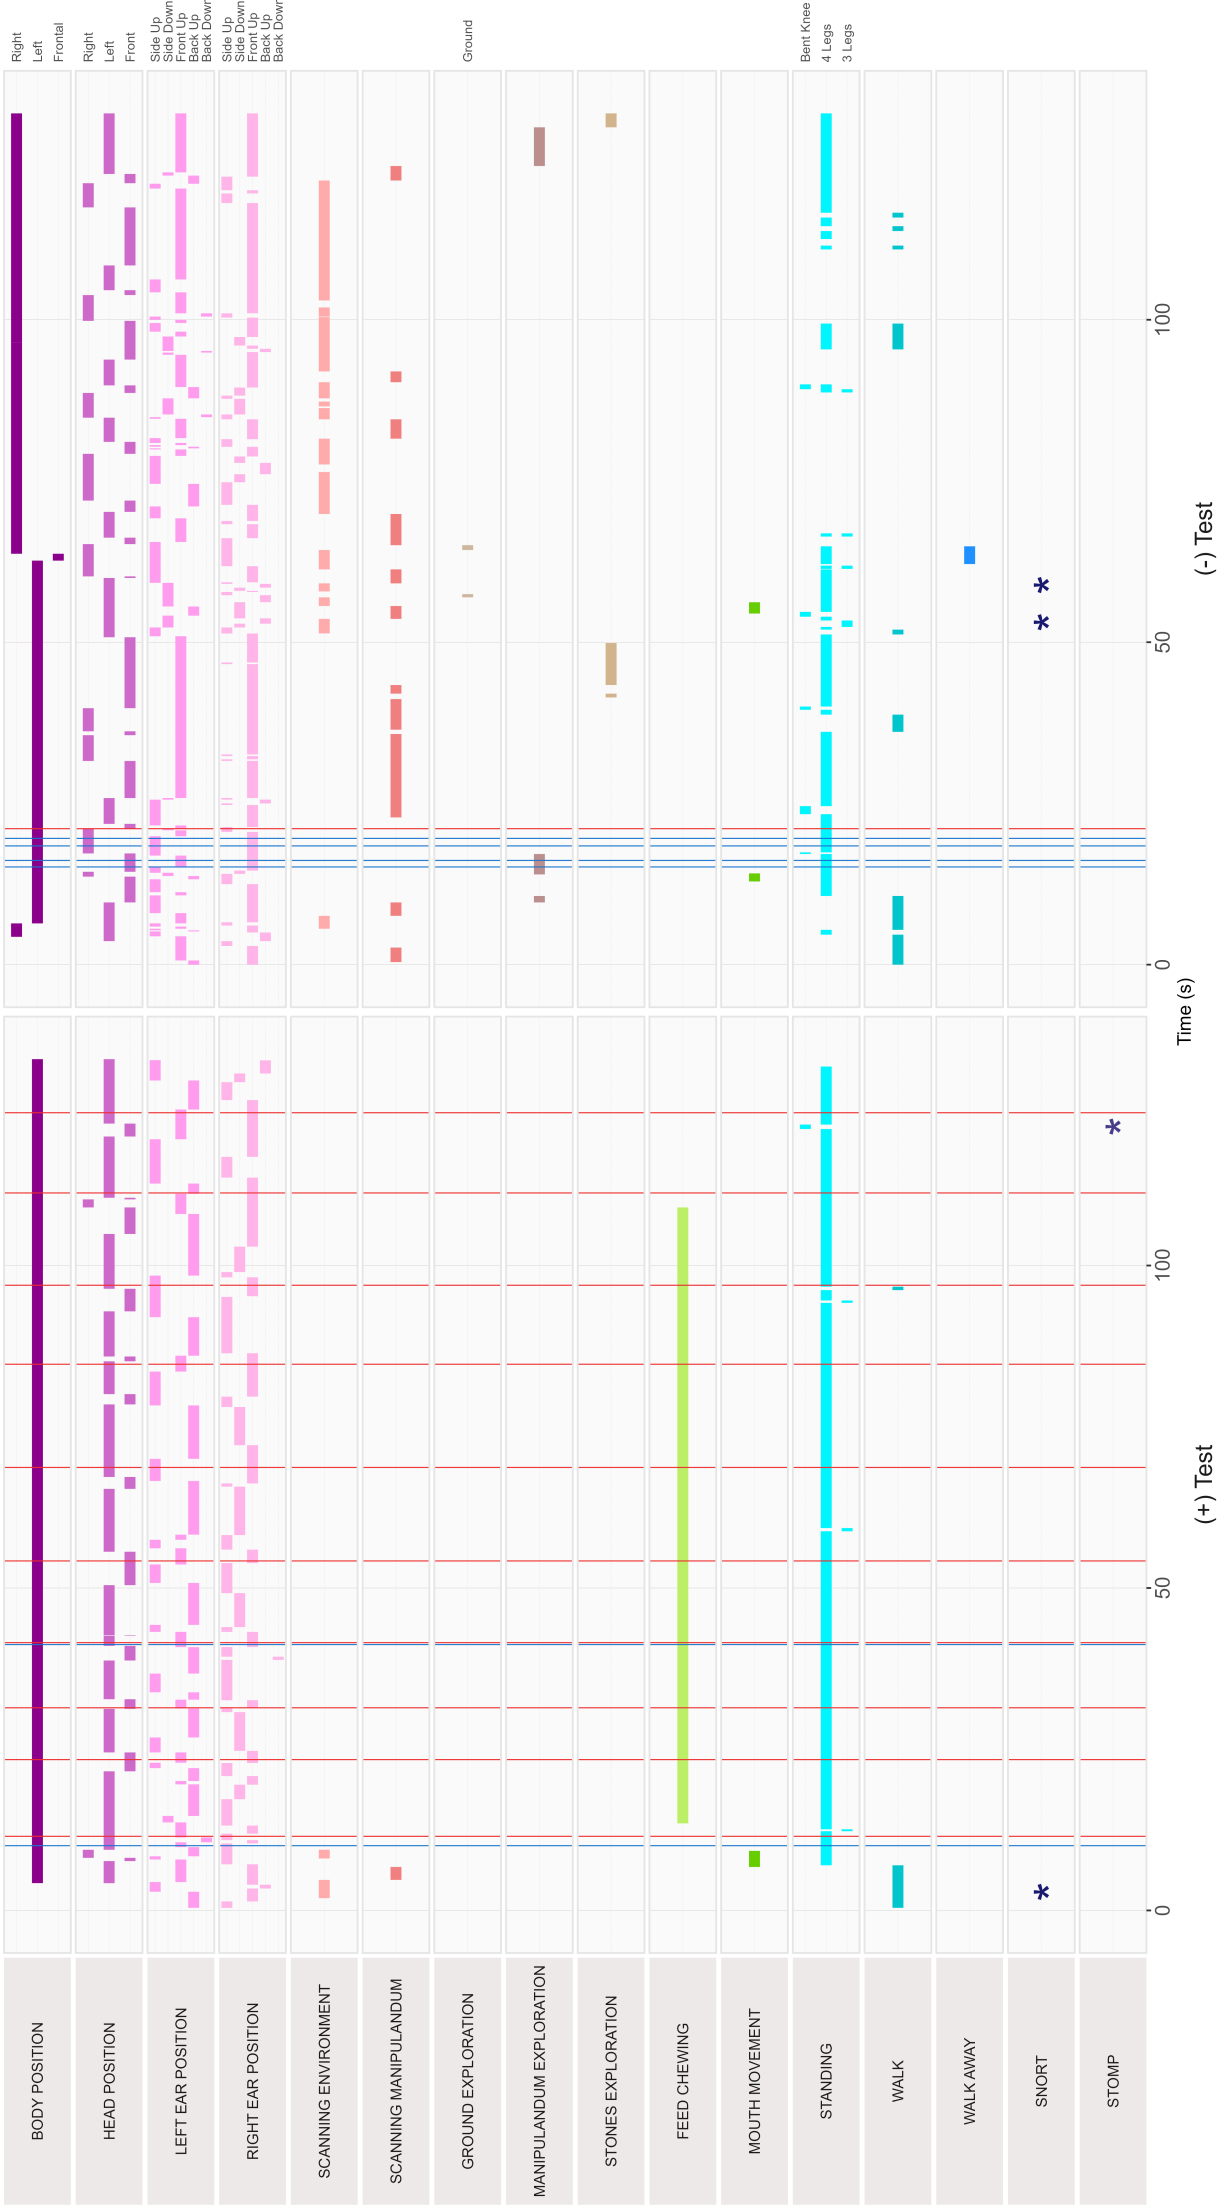



## Marta

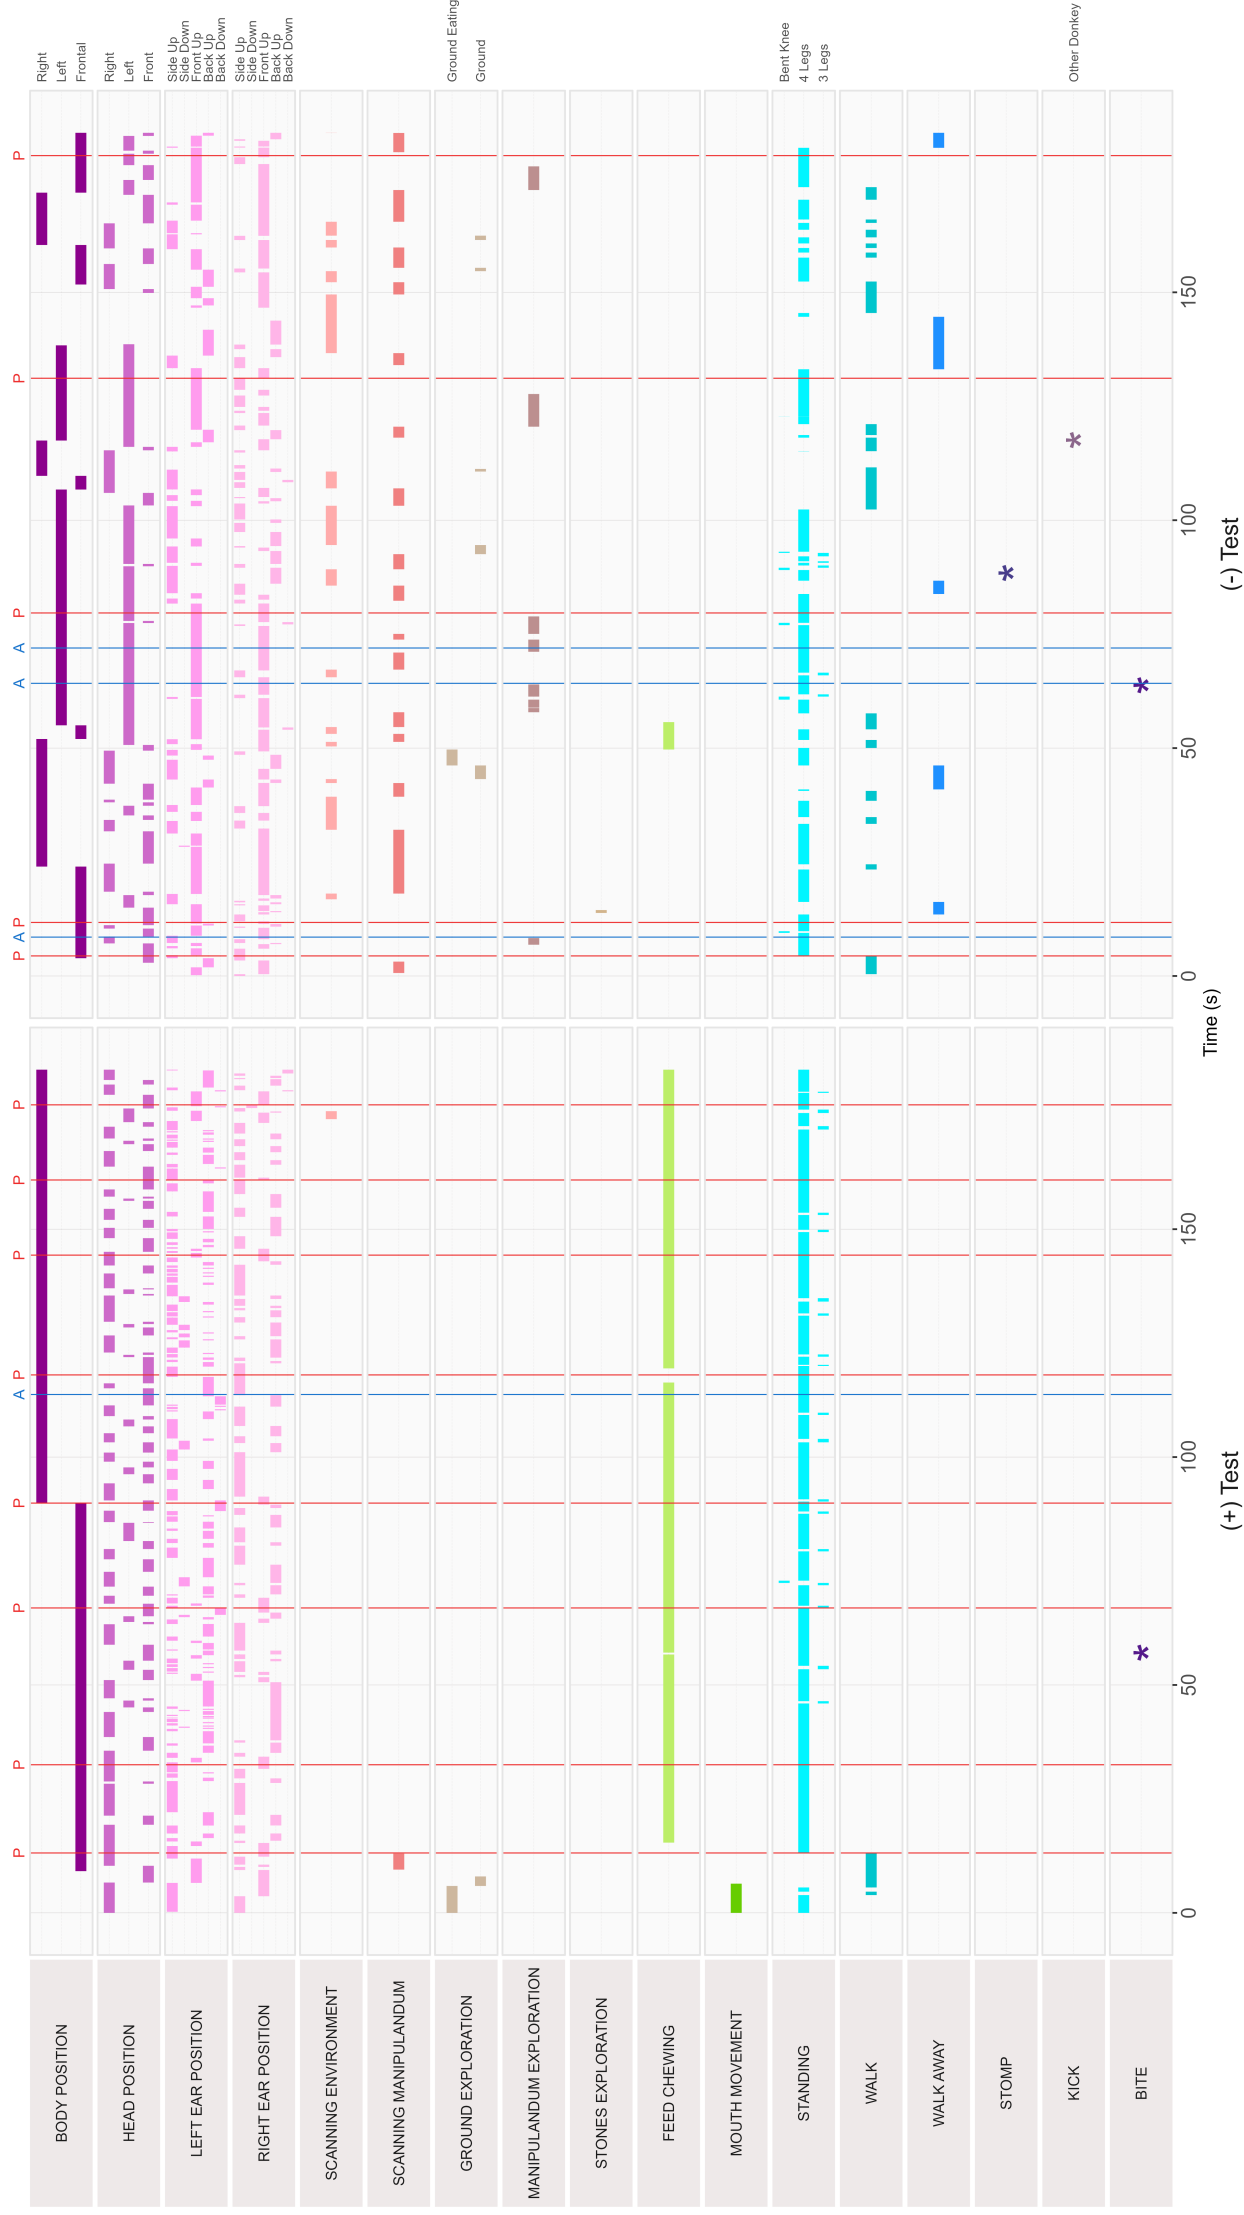

Muchacha

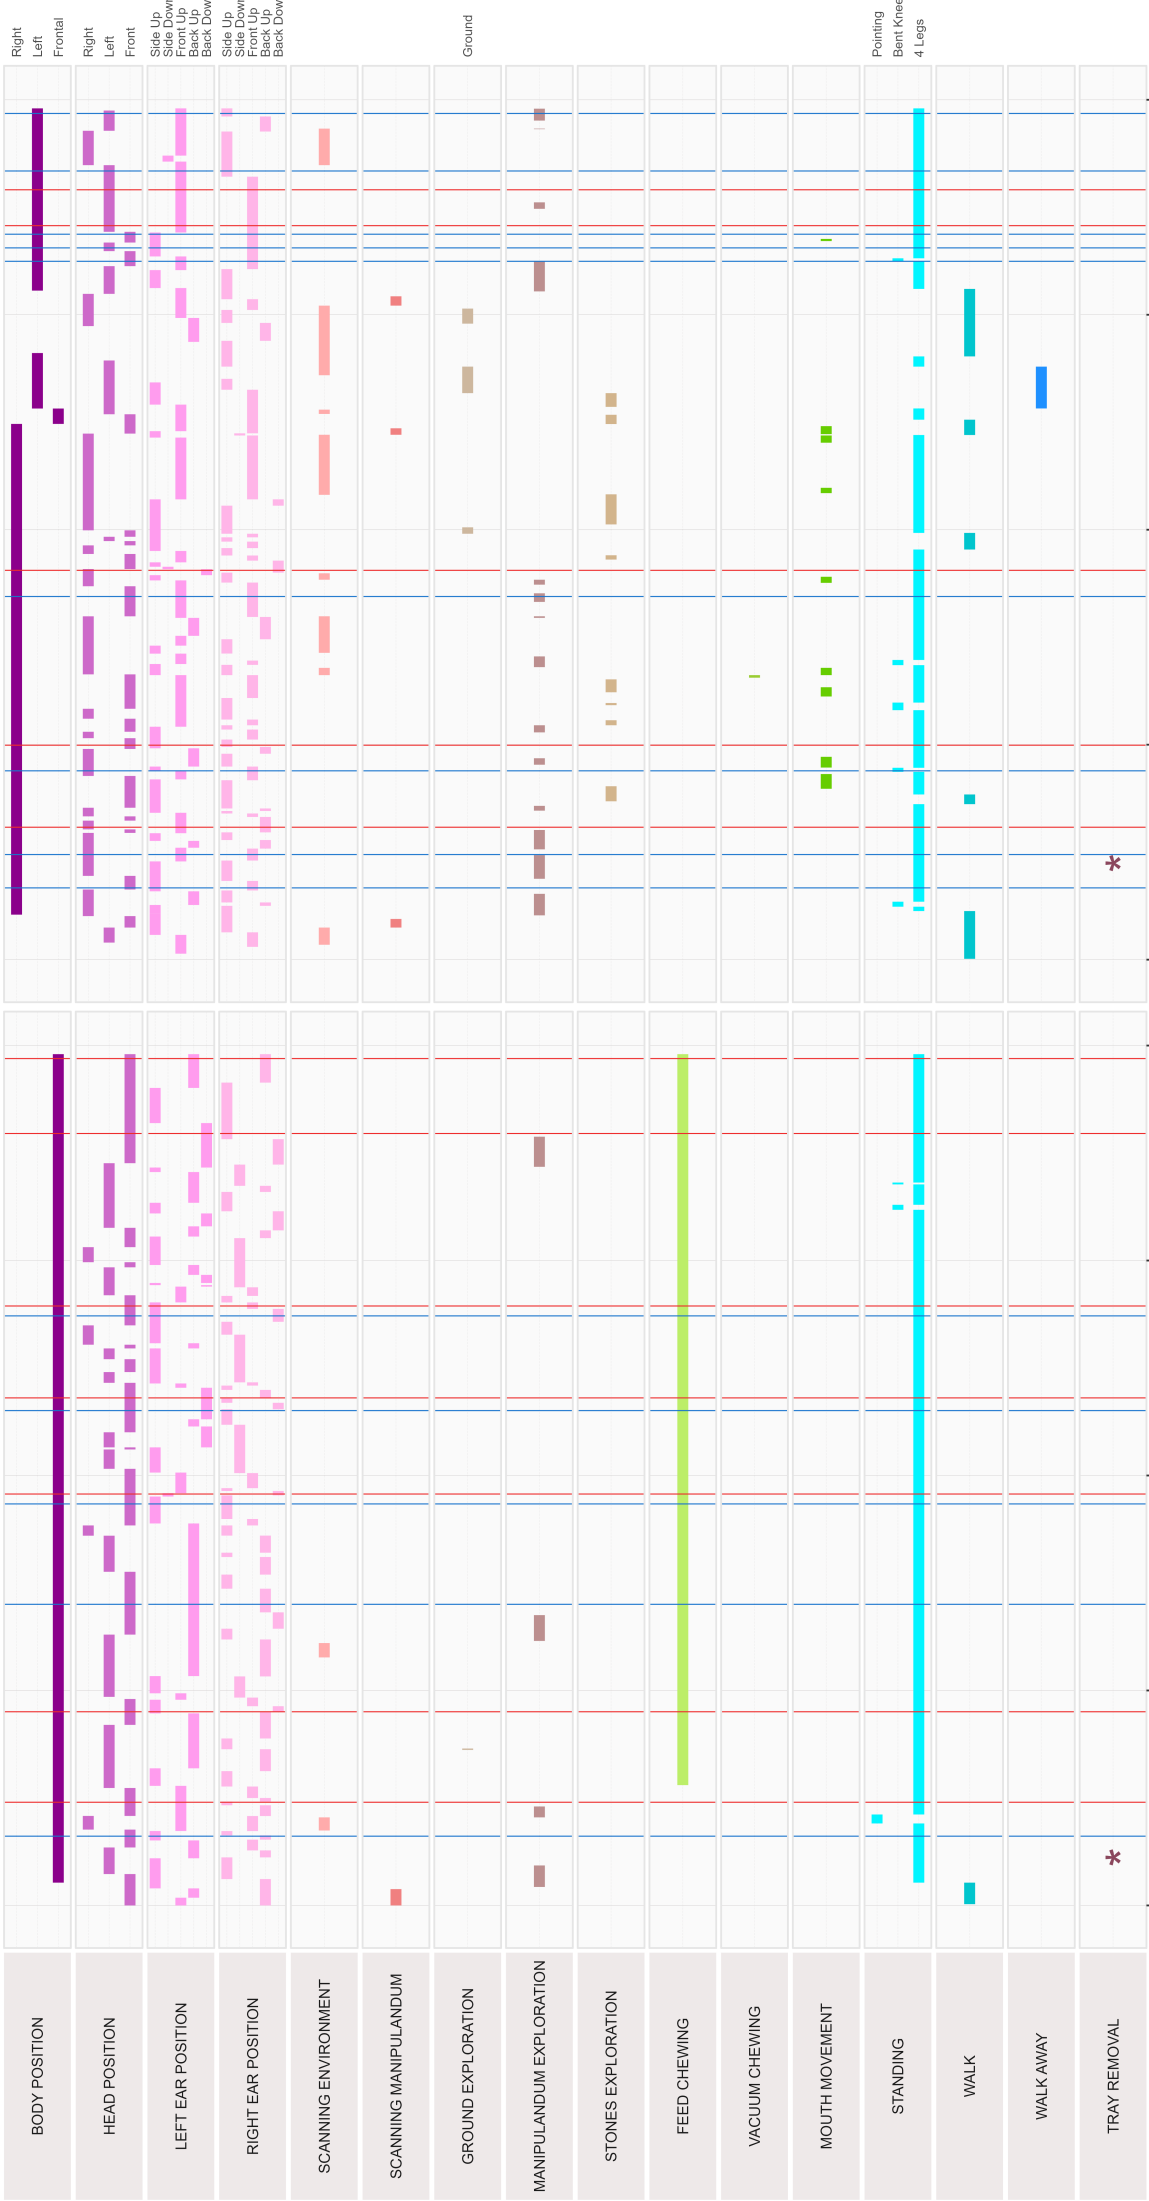

Pepe

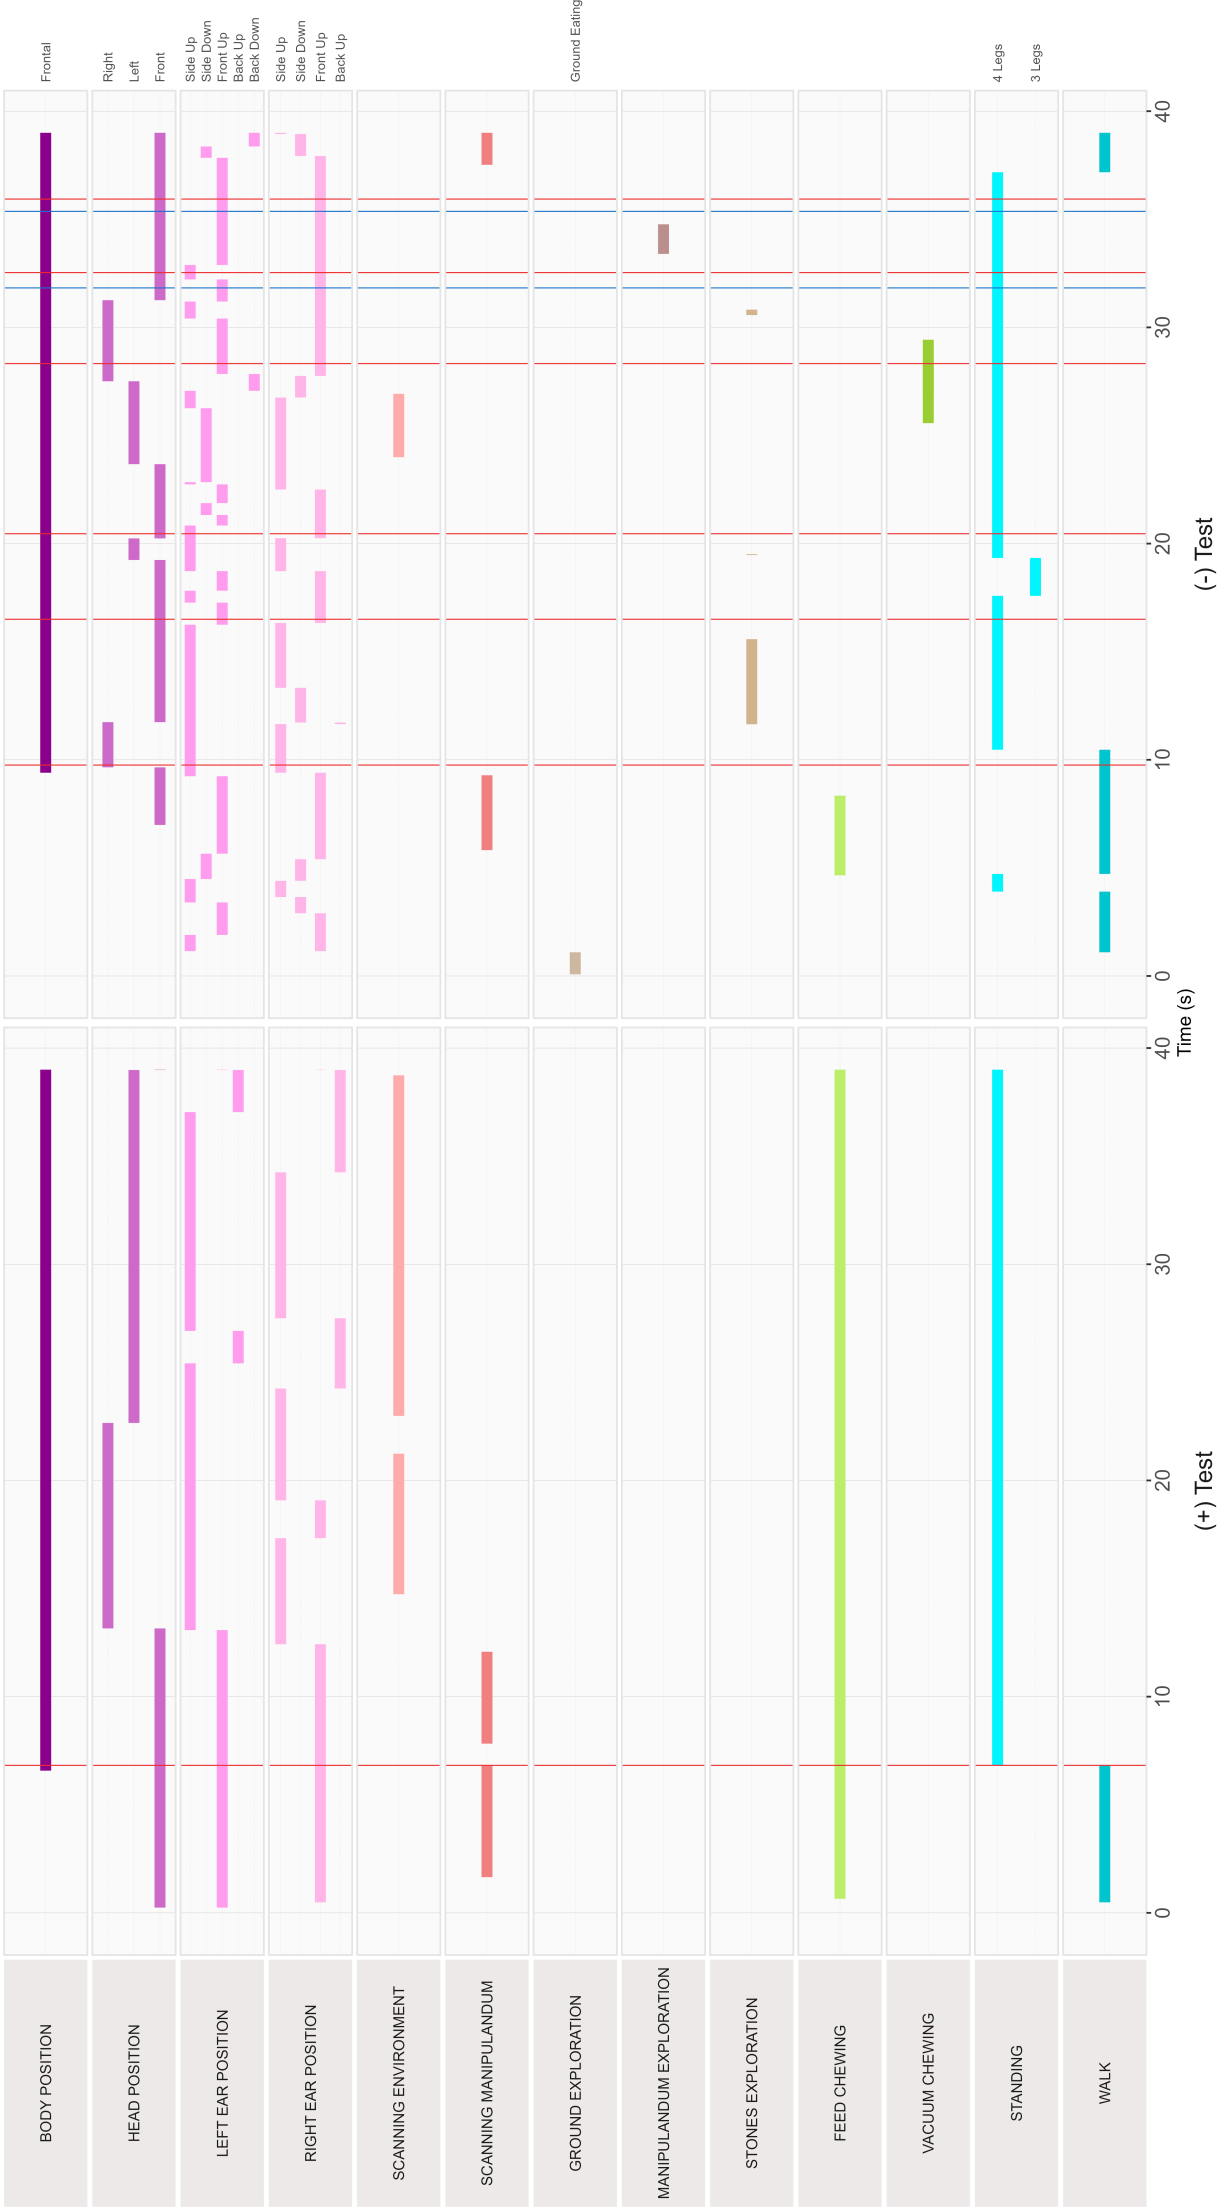

Rosetta

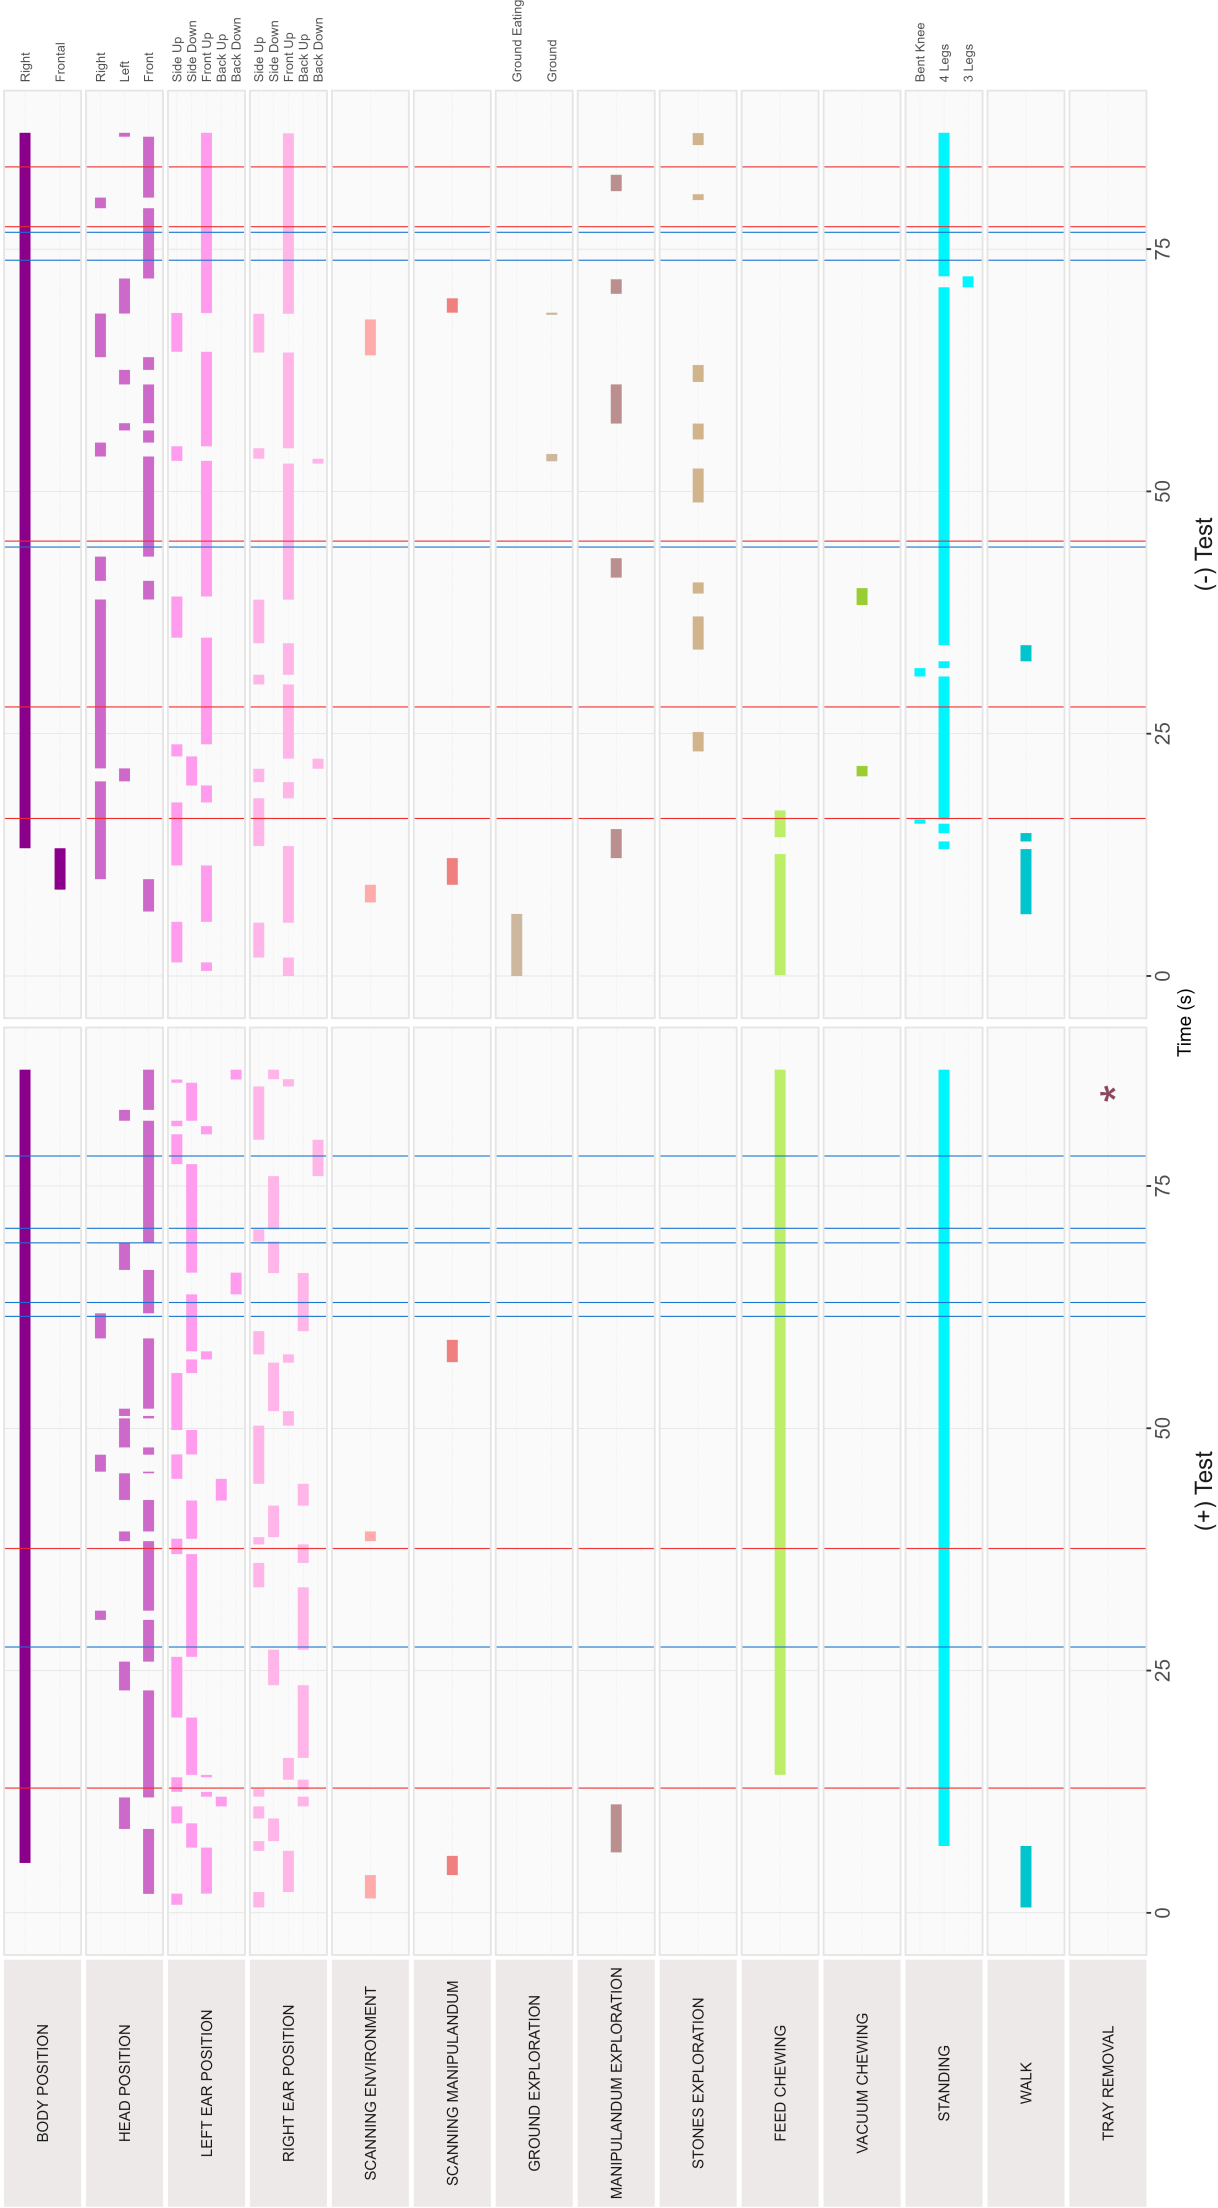

## Rosolino

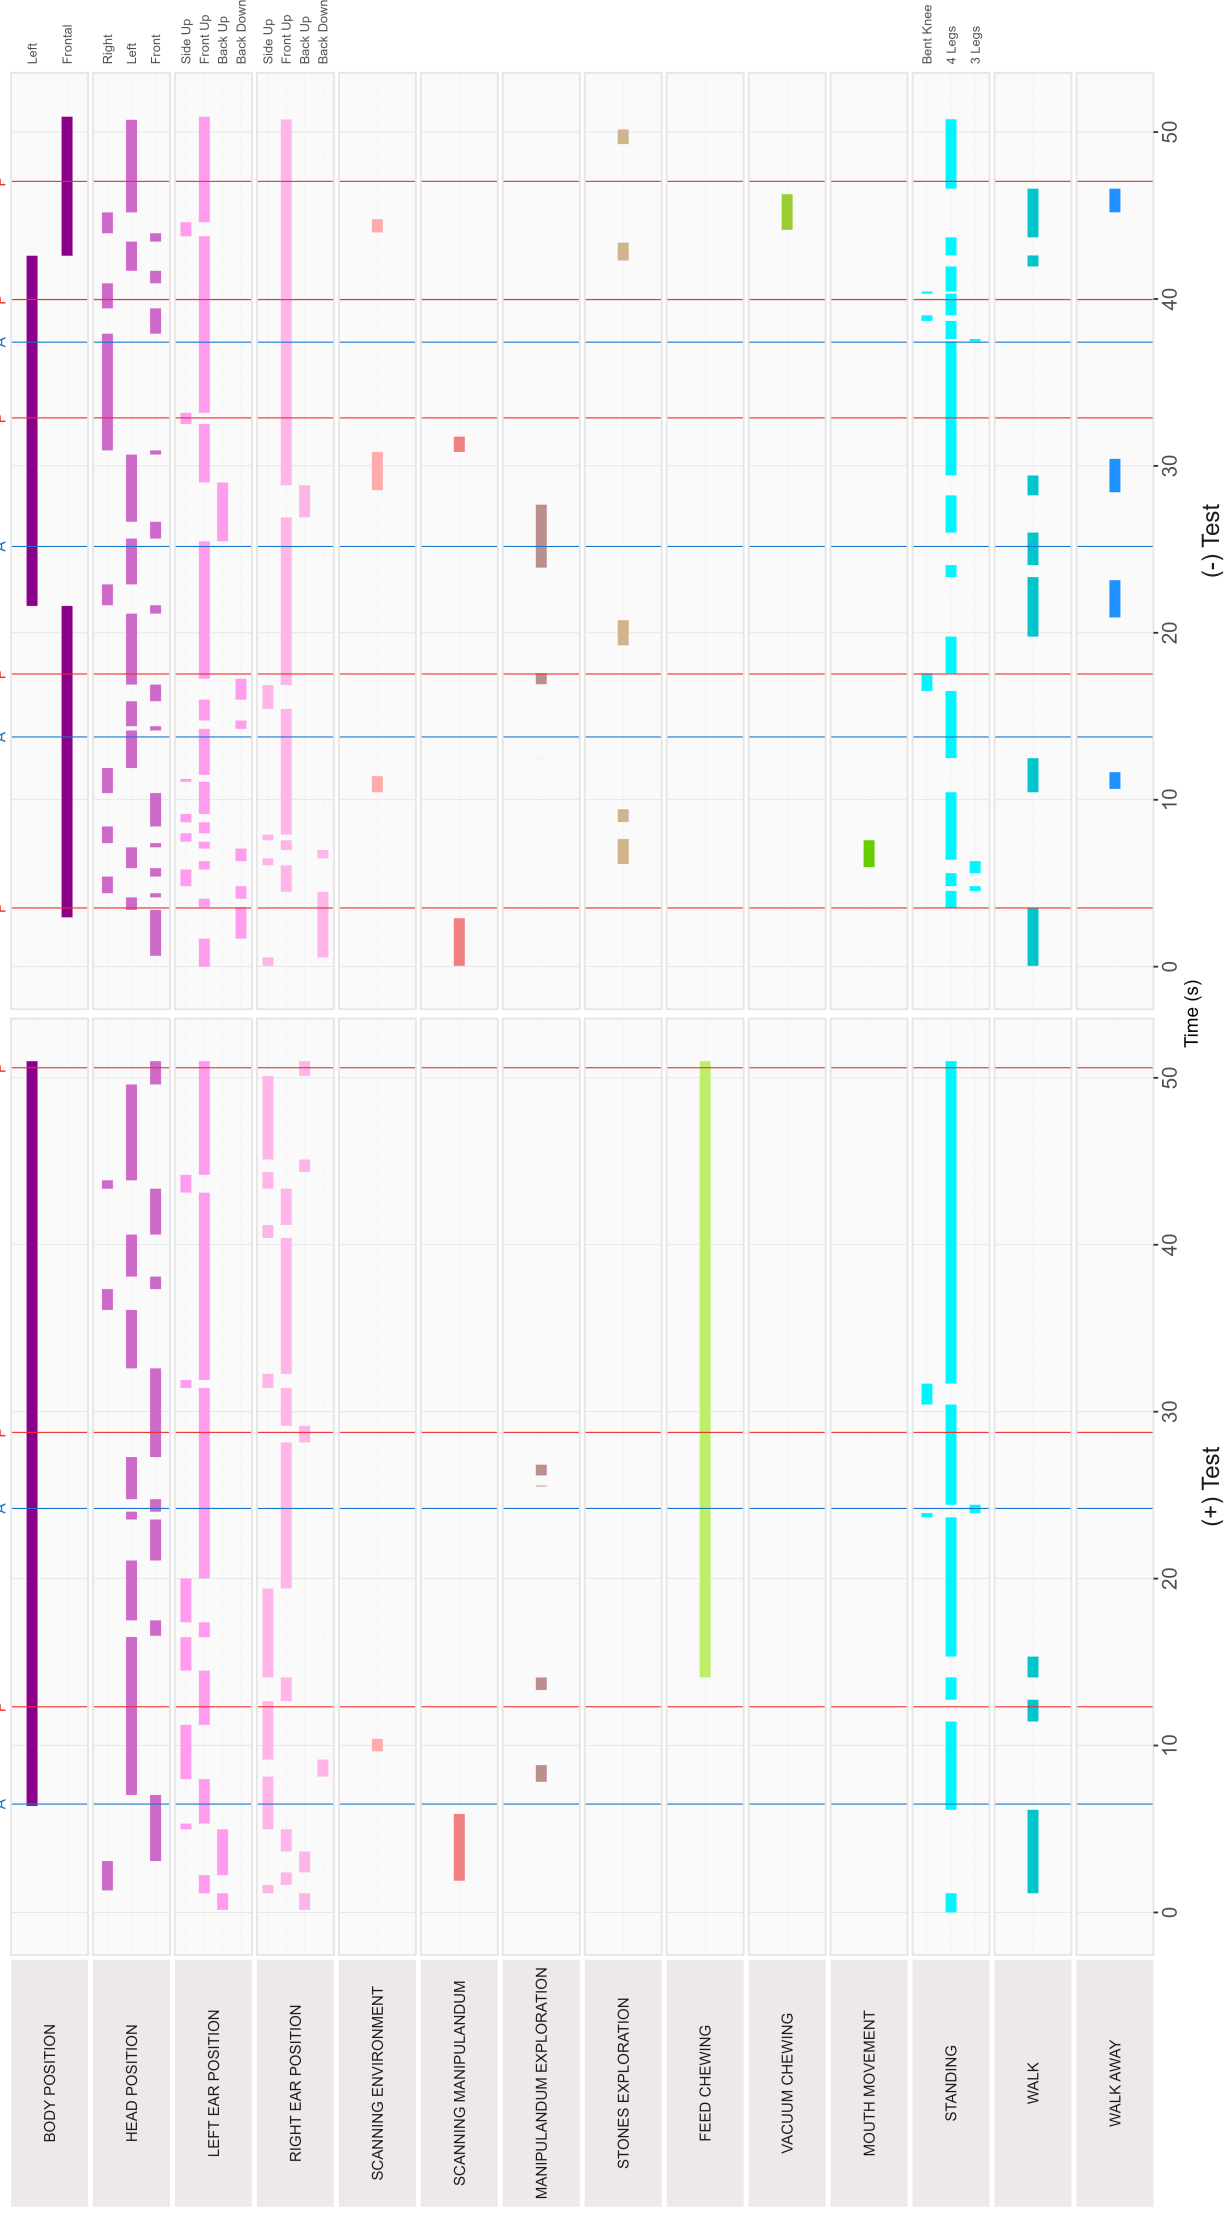

Supplement: s1 [file s1]
